# Supplementary material for: Holographic direct sound printing
Source: PubMed Central journal article supplement — Nat Commun. 2024 Aug 6;15:6691. doi: 10.1038/s41467-024-50923-8 (PMC11303524; doi:10.1038/s41467-024-50923-8), 2024-08-06
Supplement: 41467_2024_50923_MOESM1_ESM.pdf [file 41467_2024_50923_MOESM1_ESM.pdf]

# **Supplementary Information**

## **Holographic Direct Sound Printing**

Mahdi Derayatifar<sup>a</sup>, Mohsen Habibi<sup>b</sup>, Rama Bhat<sup>a</sup>, Muthukumaran Packirisamy<sup>a\*</sup>

<sup>a</sup>Optical Bio Microsystems Laboratory, Micro-Nano-Bio Integration Center, Department of Mechanical, Industrial and Aerospace Engineering, Concordia University, Montreal, QC, Canada.

<sup>b</sup>Department of Mechanical and Aerospace Engineering, University of California at Davis, CA, USA.

\*Corresponding author: [m.packirisamy@concordia.ca](mailto:m.packirisamy@concordia.ca)

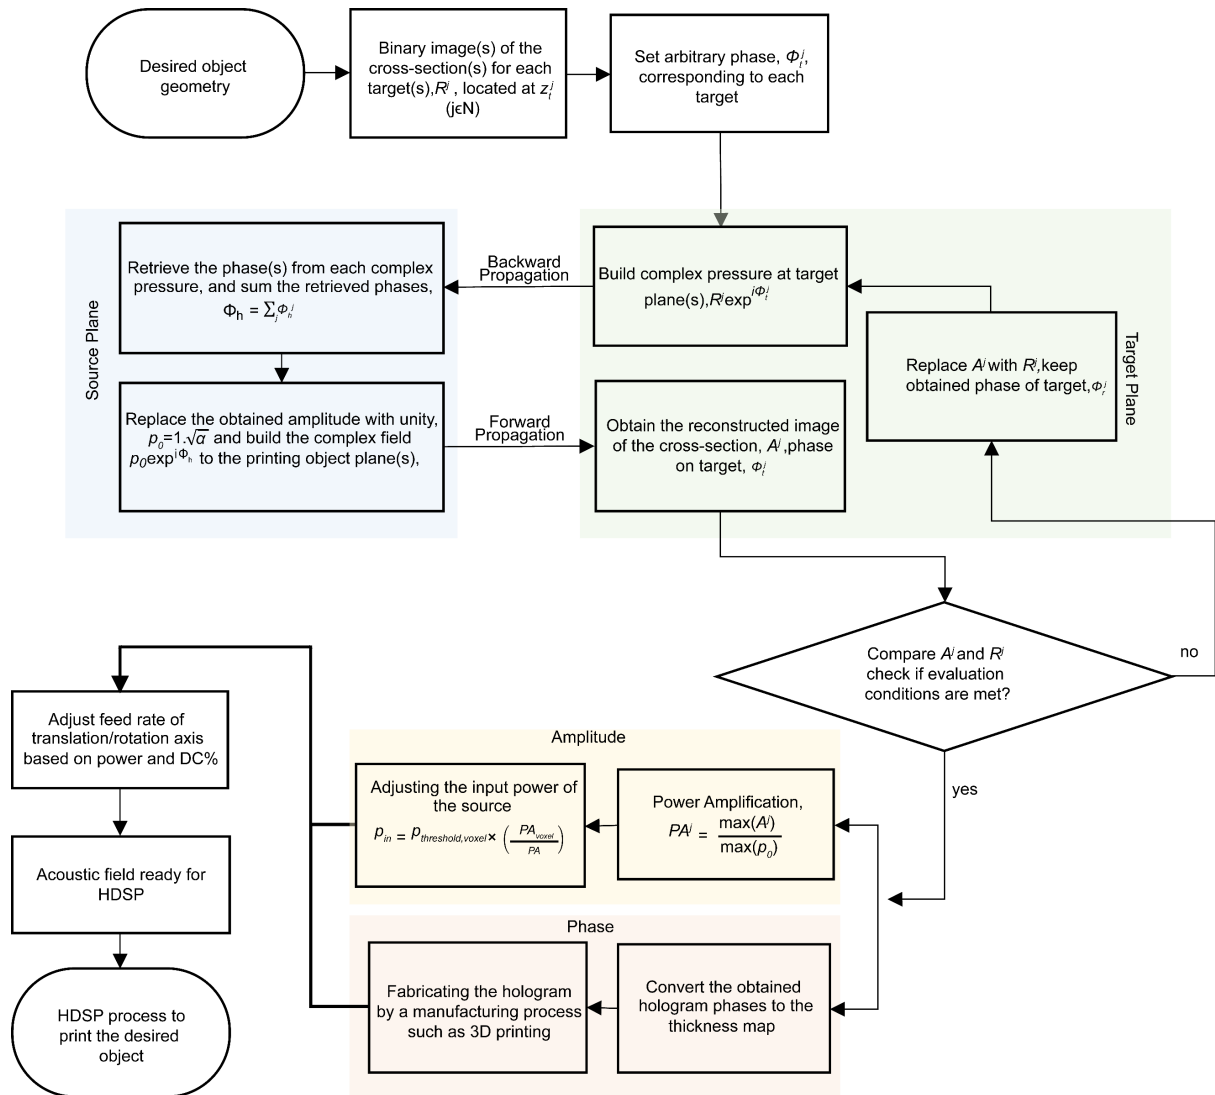

**Supplementary Fig. 1.** HDSP process flow, starting from creating acoustic holography field required for HDSP.

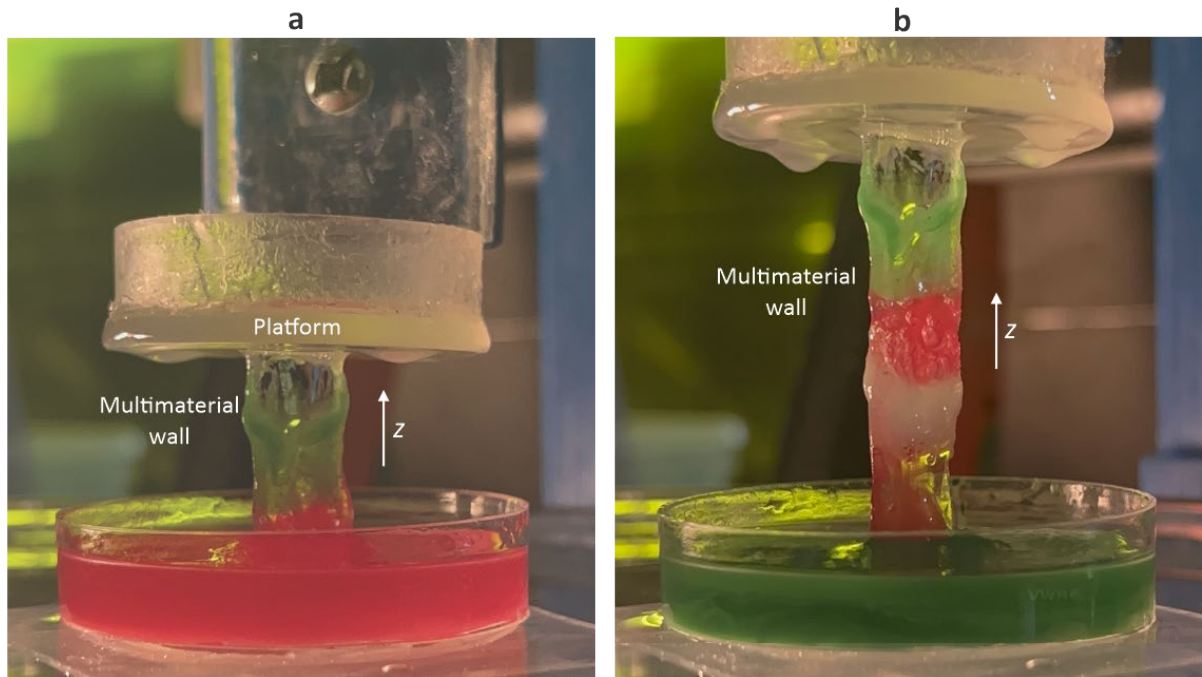

**Supplementary Fig. 2. (a) and (b)** Sequential multi-material printing in HDSP, transparent PDMS followed by green, red and white dyed PDMS are printed. Printing parameters:  $OD = 25$  mm,  $P = 8$  W,  $f_0 = 2.24$  MHz,  $DC = 50\%$ .

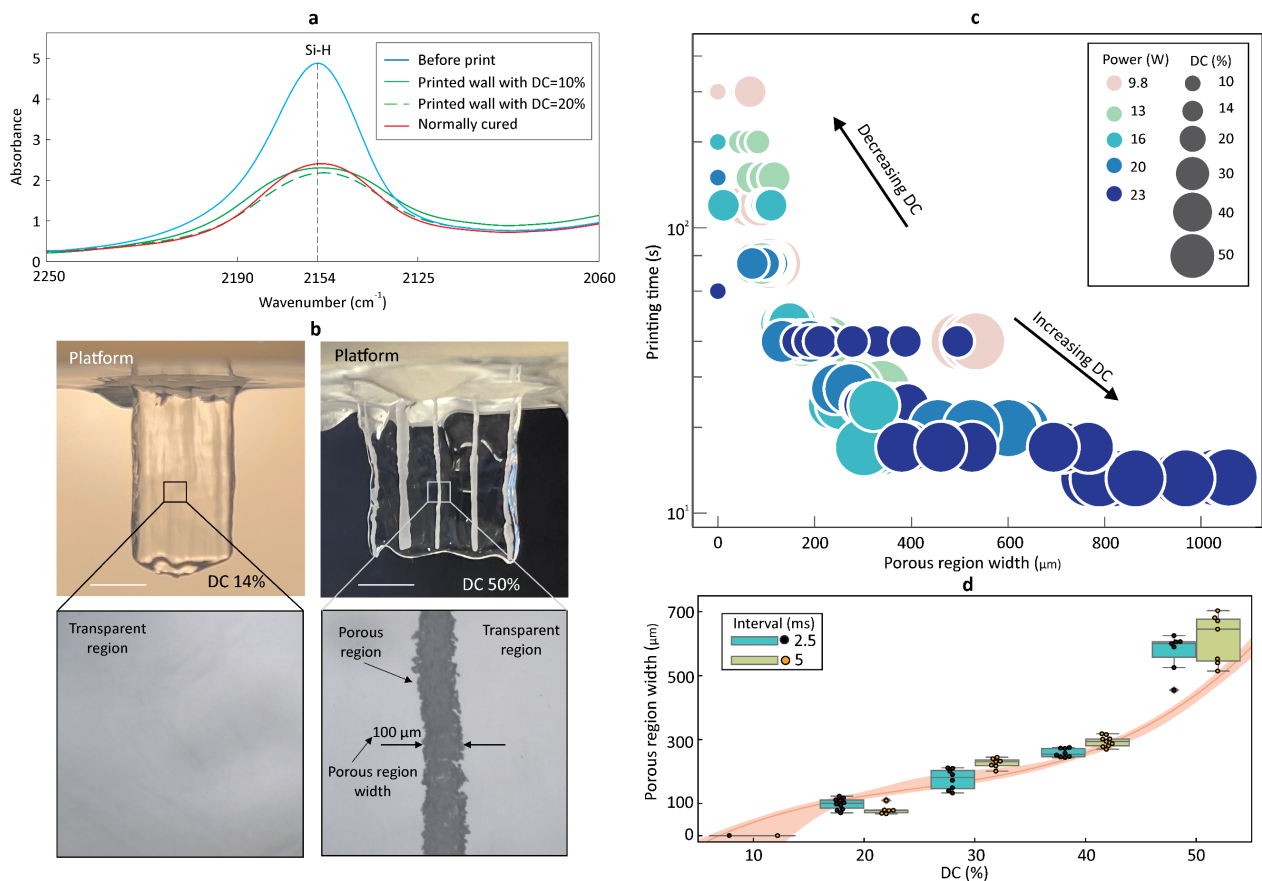

**Supplementary Fig 3.** Material and microstructure characterization of the printing process. **(a)** comparison of IR spectrum for Si-H ( $2154 \text{ cm}^{-1}$ ) for printed line with 10%, 20%, normally cured PDMS and that of uncured PDMS. **(b)** Displays the printed parts with DC settings at 50% showing bubble cloud formation and at 14% without bubble clouds, respectively. Scale bars represent 10 mm. The extended view showing the 10x magnified view of the bubble cloud. **(c)** A comprehensive experimentally-obtained graph illustrating the relation between printing parameter such as, power and DC% on width of micro-bubble cloud formed within the part and printing time for a HDSP wall object extruded 10mm in z-direction. Changing the interval as another printing parameter and impact the bubble cloud formation, which shown in **(d)** with burst signal intervals of 2.5 ms and 5 ms indicated by black and yellow dots, respectively, for various DC%. The box plots showing quartiles and range, and a fitted curve with a confidence band.

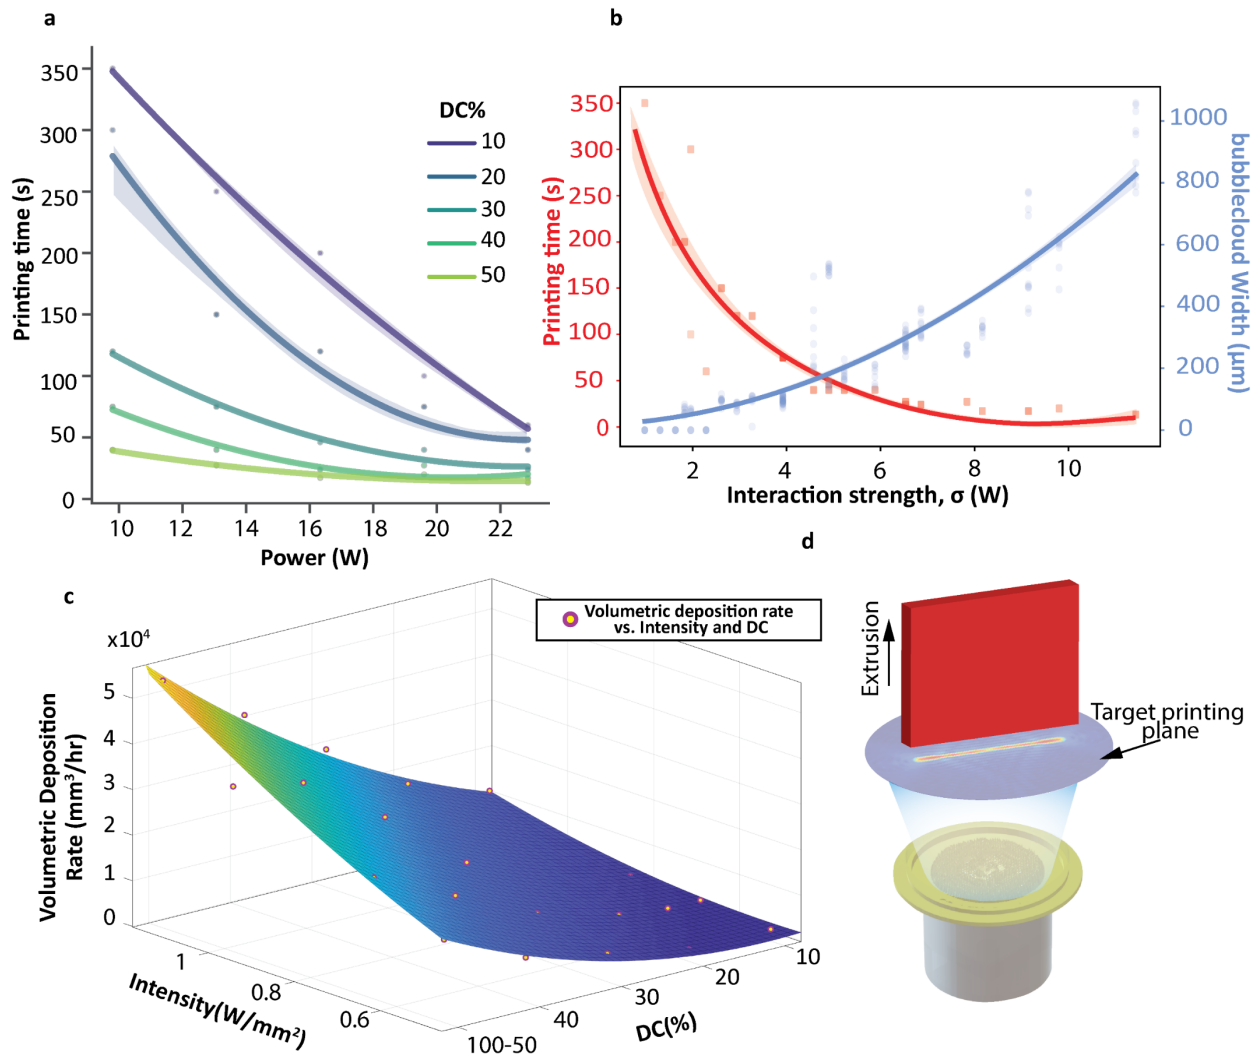

**Supplementary Fig. 4.** (a) The relationship between power and printing time for the wall printing, with the printing process schematic shown in (d). (b) Relationship between the effective power parameter, Interaction strength  $\sigma$ (W), and Printing time (s) (shown in red), alongside bubble cloud formation width ( $\mu\text{m}$ ) (shown in blue). (c) Volumetric Deposition Rate ( $\text{mm}^3/\text{hr}$ ) interpolated with respect to the intensity ( $\text{W}/\text{mm}^2$ ) and DC(%). (d) Schematics of the HDSP performing wall printing using a line geometry as the target object.

**Supplementary Table 1. Printing time predication for HDSP vs DSP.**

| Printing mechanism                                                                                       | HDSP                                                                                                                                                          | DSP                                                                                                                                                                                                                                                                                                                                                                                                                                                                 |
|----------------------------------------------------------------------------------------------------------|---------------------------------------------------------------------------------------------------------------------------------------------------------------|---------------------------------------------------------------------------------------------------------------------------------------------------------------------------------------------------------------------------------------------------------------------------------------------------------------------------------------------------------------------------------------------------------------------------------------------------------------------|
| <p>Schematics of printing</p> <p>Case study: Wall</p>                                                    | 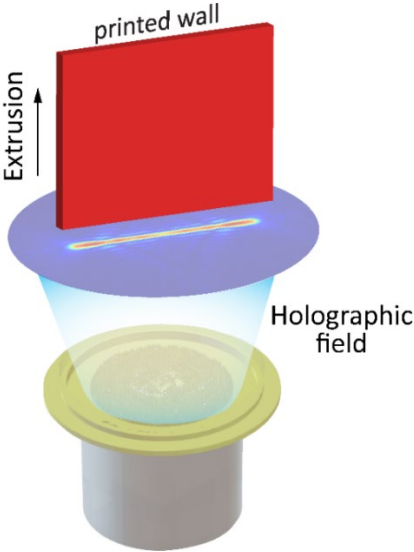                                                                             |                                                                                                                                                                                                                                                                                                                                                                                   |
| <p>Time formulation</p>                                                                                  | $time_{HDSP} = \frac{Volume}{VDR(I, DC(\%))}$ <p>The calculation of Intensity and VDR function is presented in Eq. S1</p>                                     | $time_{DSP} = \frac{length\ of\ path}{feed\ rate}$                                                                                                                                                                                                                                                                                                                                                                                                                  |
| <p>Time of print for Wall of <math>15 \times 1 \times 20 \text{mm}^3</math> (from actual Experiment)</p> | <p><math>time_{HDSP}</math>: 0.25 – 5min</p> <p>Printing transparent wall with moderate power setting:</p> <p><math>time_{HDSP} = 1.86 \text{ min}</math></p> | <ul style="list-style-type: none"> <li>Length of path/layer (mm) = 15</li> <li>Wall height=20mm</li> <li>Layer thickness<math>\approx</math>0.3mm</li> <li>Number of layers (transversal)=20mm/0.3mm=67</li> <li>Number of layers (lateral)=1mm/0.3mm<math>\approx</math>3</li> <li>Total length = 15<math>\times</math>3<math>\times</math>67(mm)</li> <li>Feed rate (mm/min) = 240</li> </ul> $time_{DSP} = \frac{Total\ length}{Feed\ rate} = 12.56 \text{ min}$ |
| <p>Example Geometry: Maple</p>                                                                           |                                                                            |                                                                                                                                                                                                                                                                                                                                                                                 |
| <p>Example of theoretical prediction of the time to</p>                                                  | $T_{HDSP} = \frac{(A_{ROI} \times 2\text{mm}^3)}{VDR\left(\frac{45W}{A_{ROI}}, 50\%\right)}$ <p>= 14.35s</p>                                                  | <ul style="list-style-type: none"> <li>length of path/layer (mm) = 61.0</li> <li>Part thickness=2mm</li> <li>Each layer thickness<math>\approx</math>0.3mm</li> <li>Number of layers=7</li> <li>Total path length = 61.0<math>\times</math>7(mm)</li> </ul>                                                                                                                                                                                                         |

|                                                           |  |                                                                                                                                                                      |
|-----------------------------------------------------------|--|----------------------------------------------------------------------------------------------------------------------------------------------------------------------|
| <p><b>print:</b> Maple leaf object with 2mm thickness</p> |  | <ul style="list-style-type: none"><li>• Feed rate (mm/min) = 240</li></ul> $T_{\text{DSP}} = \frac{\text{Total length}}{\text{Feed rate}} = \mathbf{1.77\text{min}}$ |
|-----------------------------------------------------------|--|----------------------------------------------------------------------------------------------------------------------------------------------------------------------|

**Supplementary Table 2.** Comparison of the HDSP vs DSP in terms of deposition power, total deposition energy and energy density

| Printing mechanism                                         | DSP                                                                                | HDSP                                                                                 |
|------------------------------------------------------------|------------------------------------------------------------------------------------|--------------------------------------------------------------------------------------|
| Frequency (MHz)                                            | 2.15                                                                               | 2.24                                                                                 |
| Geometry and area of the target image                      | Focal point,<br>0.3848 (mm <sup>2</sup> )                                          | Line,<br>6.63 (mm <sup>2</sup> )                                                     |
| Pressure pattern                                           | 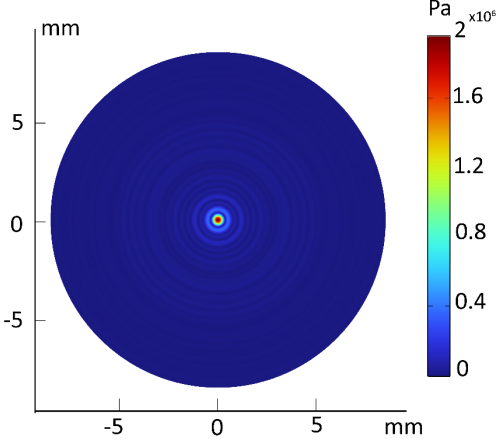  |   |
| Intensity pattern(W/mm <sup>2</sup> )                      |  |  |
| Deposition power at the image plane (W)                    | 1.18                                                                               | 23.18                                                                                |
| Total Printing Time (min)                                  | ~12.56                                                                             | ~0.5                                                                                 |
| Total Energy Deposition (J):<br>power × time               | <b>Simulation:</b> 1.18W×12.56×60=889.25                                           | <b>Simulation:</b> 23.18W×0.5×60=695.4                                               |
| Total Energy Input to the system (J)-<br>(from experiment) | <b>Experiment:</b> 10W×12.56×60=7536J                                              | <b>Experiment:</b> 30W×0.5×60=2790                                                   |



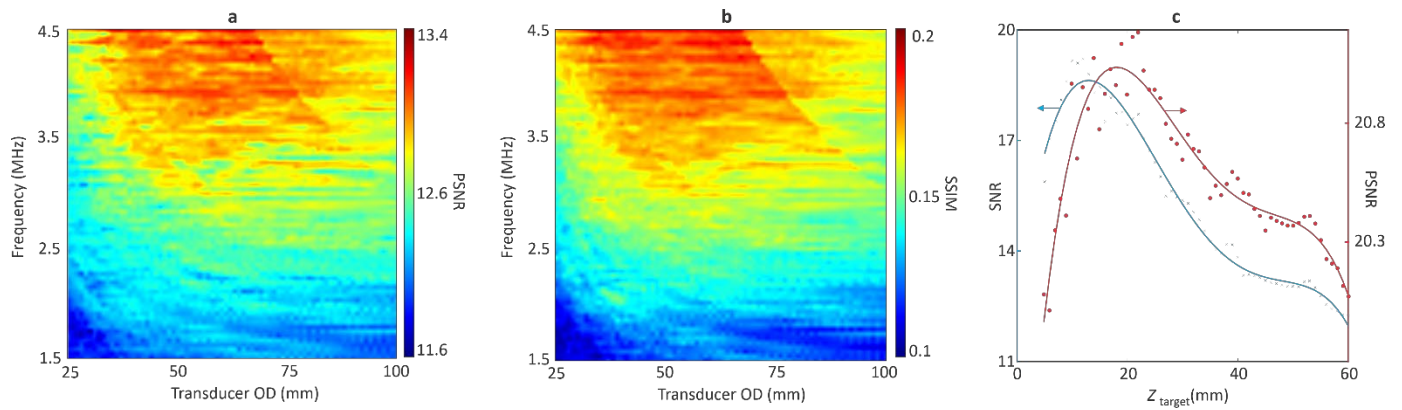

**Supplementary Fig. 5.** (a) PSNR and (b) normalized SSIM surface plots for reconstructed image quality measure by varying frequency,  $f_0$  and source aperture,  $OD$ . (c) SNR curve (blue colored) and PSNR curve (red colored) showing the dependency of the generated image to the various target plane in z-direction, for transducer with  $\{OD=25\text{mm}, f_0=2.24\text{ MHz}\}$  and  $\{OD=50\text{mm}, f_0=2.28\text{ MHz}\}$ , respectively.

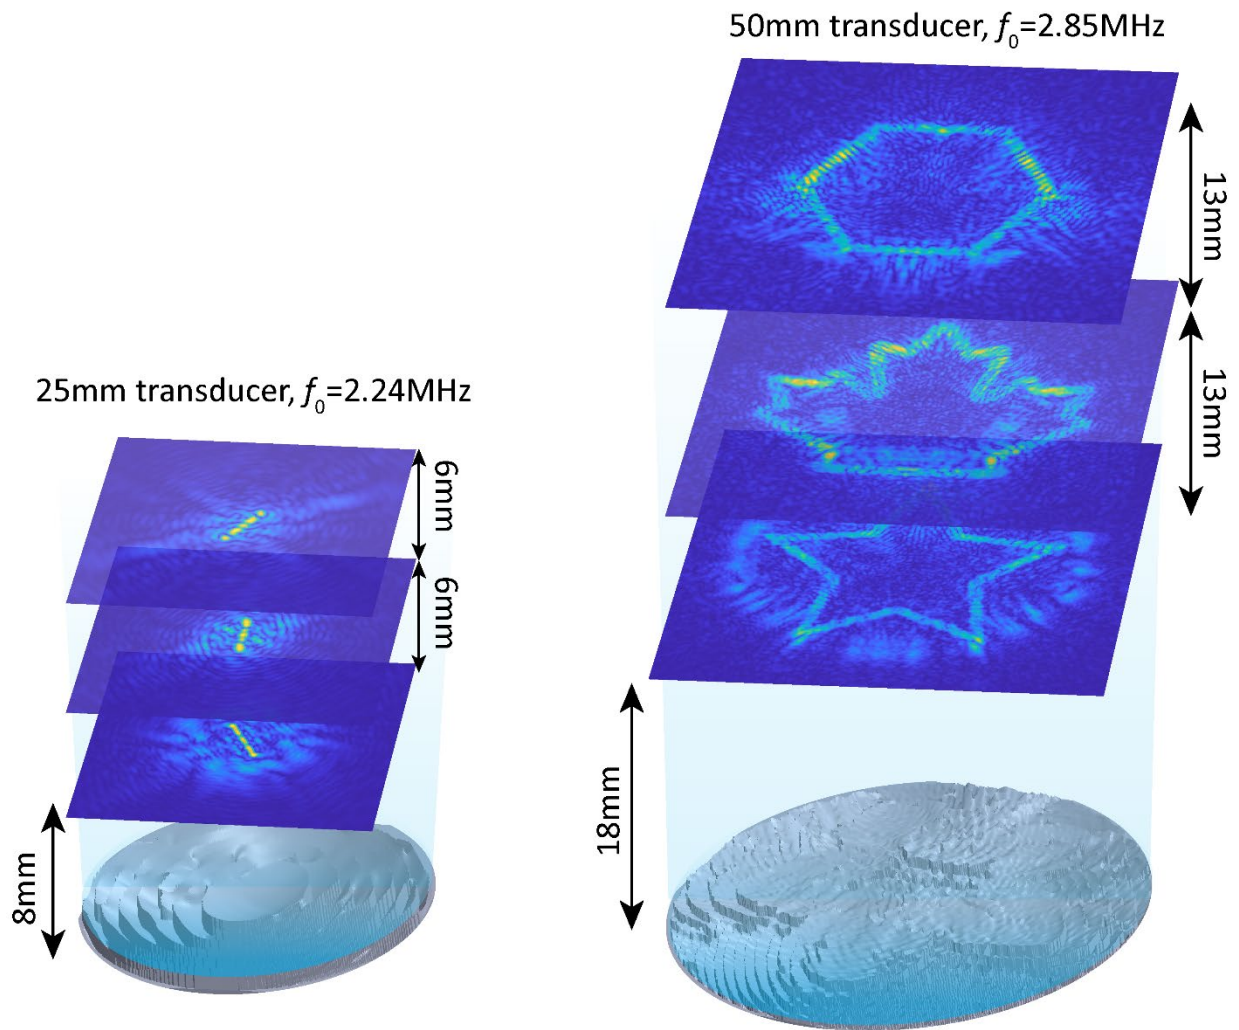

**Supplementary Fig. 6.** Reconstruction for Multi-plane object printing capability with HDSP. Input parameter of transducer OD25mm and 2.24MHz frequency with  $191 \times 191$  element hologram generating various line images (Left) and transducer OD50mm and 2.85MHz frequency with  $386 \times 386$  element hologram (Right)

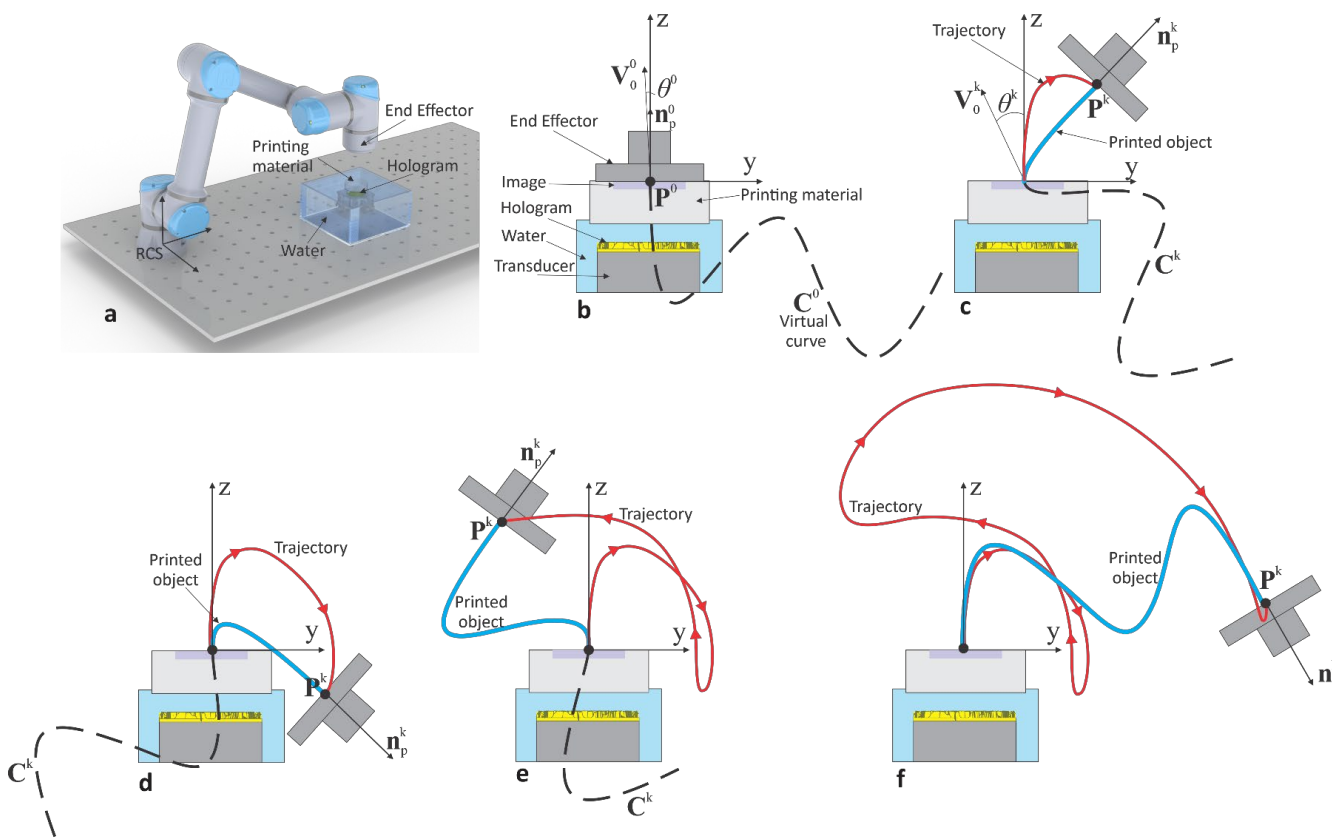

**Supplementary Fig. 7.** (a) Robot-assisted HDSP. (b)-(f) Subsequent steps of printing an object with the computed trajectory.
