# Supplementary material for: Holographic direct sound printing
Source: PubMed Central journal article supplement — Nat Commun. 2024 Aug 6;15:6691. doi: 10.1038/s41467-024-50923-8 (PMC11303524; doi:10.1038/s41467-024-50923-8), 2024-08-06
Supplement: 41467_2024_50923_MOESM3_ESM.pdf [file 41467_2024_50923_MOESM3_ESM.pdf]

## Description of Additional Supplementary Files

### **Supplementary Movie Legends:**

**Supplementary Movie 1:** Transparent wall printing with HDSP mounted on a 3axis CNC positioner.

**Supplementary Movie 2:** Transparent wall printing in HDSP with printing platform mounted on robot armUR5e.

**Supplementary Movie 3:** Helix Printing with HDSP, demonstrating an example of an extrusion path with rotation.

**Supplementary Movie 4:** Unsupported U-structure with robotic-assisted HDSP, demonstrating continuous layerless extrusion and path following on a 6-axis UR5e robotic arm-mounted platform.

**Supplementary Movie 5:** High speed imaging of holographically created 2-spots simultaneous printing with HDSP.

**Supplementary Movie 6:** High speed imaging of holographically created 3-spots simultaneous printing with HDSP.

**Supplementary Movie 7:** Remote Distance Printing in HDSP using optically opaque printing material.

**Supplementary Movie 8:** Arc printing with robotic-assisted HDSP, using MECA500 robotic arm.

**Supplementary Movie 9:** Arc with robotic-assisted HDSP, using UR5e robotic arm. S

**Supplementary Movie 10:** Twist Cane structure as example of freeform printing with combined movement path using HDSP.

**Supplementary Movie 11:** Printing unsupported Zigzag structure with HDSP using MECA500 robotic arm
